# Supplementary figures and images for: Identifying areas prone to coastal hypoxia – the role of topography
Source: Copernicus journal article supplement (doi:10.5194/bg-2019-130), 2019-04-16

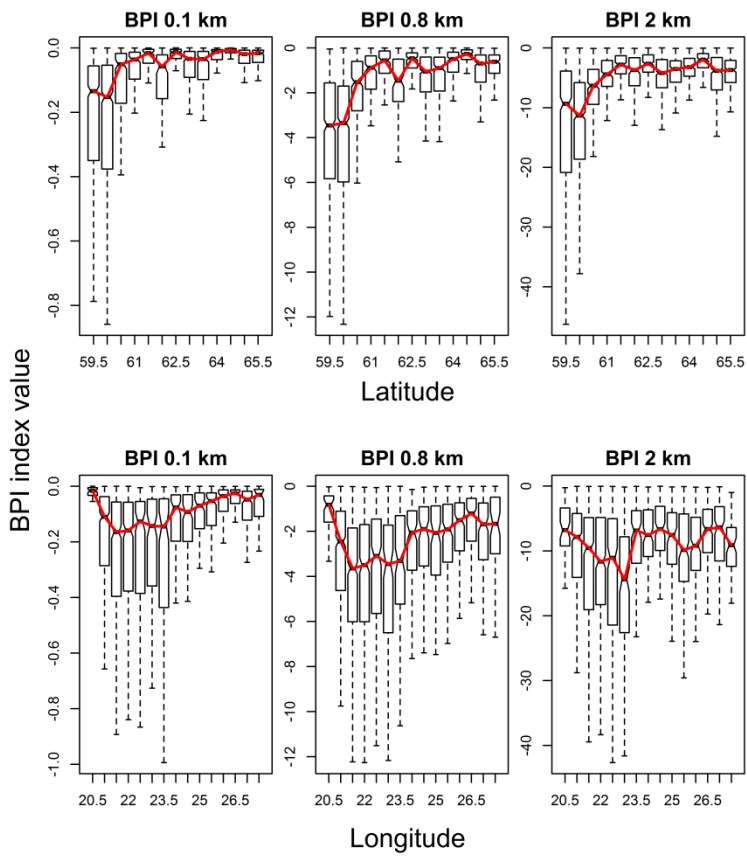

Figure S1. Boxplots showing the prevalence of depressions.

Supplement: Supplementary file 1 [file bg-2019-130-supplement.pdf]
